# Supplementary material
Source: Springer Nature journal article supplement (https://www.springermedizin.de/resource/supplementary/12879_2013_2603_MOESM1_ESM.pdf/9444948)

a i)

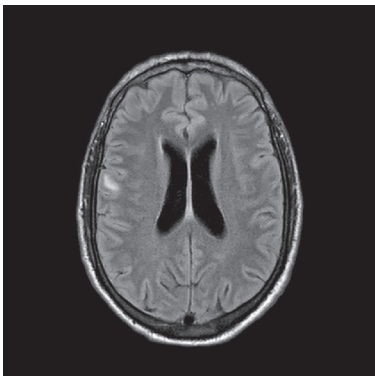

ii)

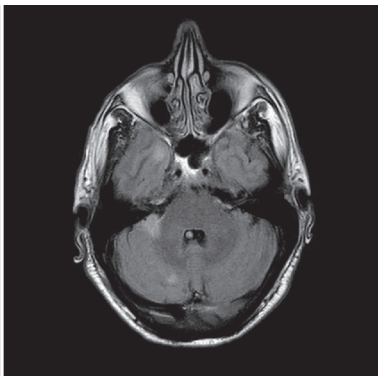

b i)

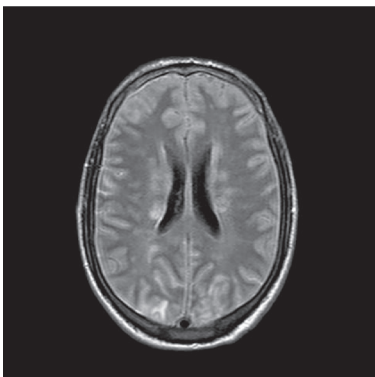

ii)

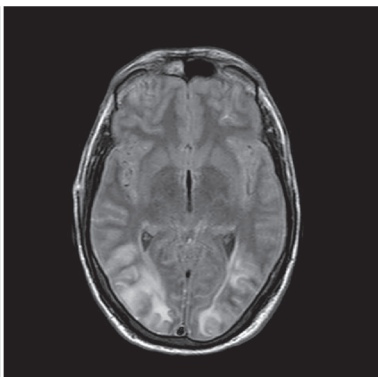

c i)

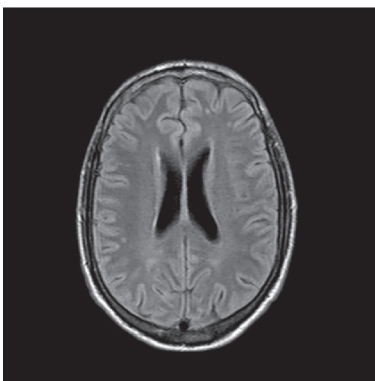

ii)

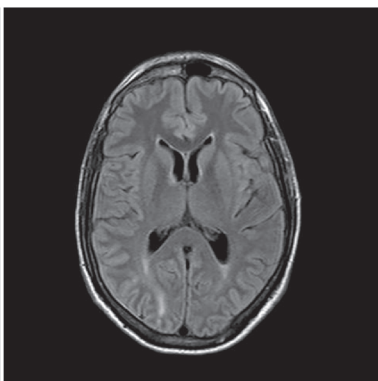

Supplement: MOESM1 [file 9444948]
